# Supplementary material
Source: publisher figshare collection journal article supplement (https://springernature.figshare.com/ndownloader/files/22361547)

A

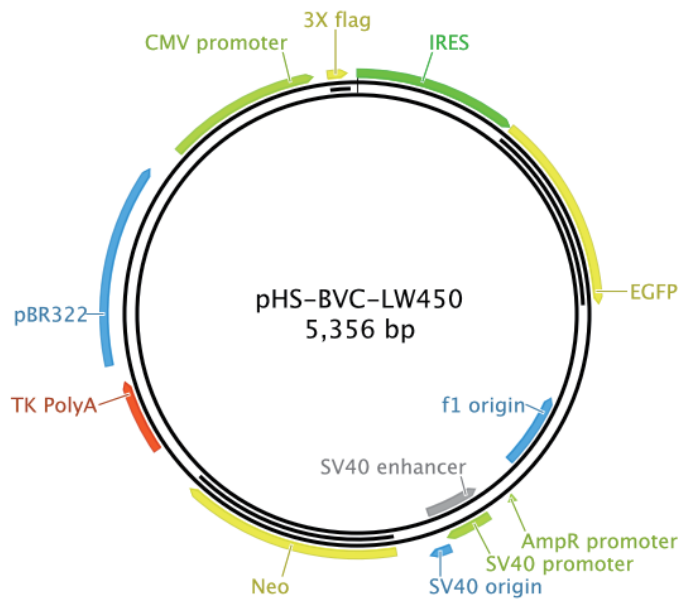

B

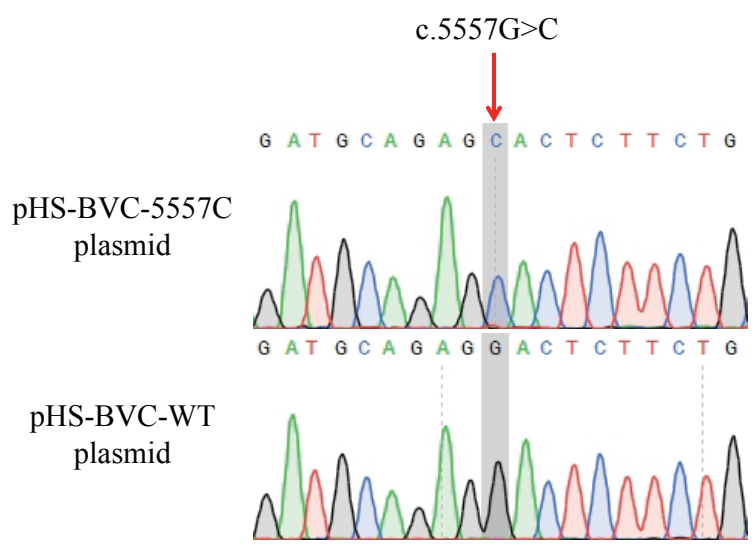

Supplement: Supplementary file [file 22361547]
